# Supplementary material for: An open and extensible framework for spatially explicit land use change modelling: the lulcc R package
Source: Copernicus journal article supplement (doi:10.5194/gmd-8-3215-2015), 2015-10-09
Supplement: Supplementary file 2 [file gmd-8-3215-2015-supplement.zip]

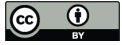

## *Supplement of*

# **An open and extensible framework for spatially explicit land use change modelling: the lulcc R package**

**S. Moulds et al.**

*Correspondence to:* S. Moulds ([simon.moulds10@imperial.ac.uk](mailto:simon.moulds10@imperial.ac.uk))

- [gmd-8-3215-2015-supplement-title-page.pdf](#)
- [supplements](#)
  - [README](#)
  - [lulcc.pdf](#)
  - [lulcc\\_1.0.0.tar.gz](#)

The copyright of individual parts of the supplement might differ from the CC-BY 3.0 licence.
